# Supplementary material for: Blocking Nonspecific Interactions Using Y-Shape Poly(ethylene glycol)
Source: MDPI journal article supplement (doi:10.3390/ijms241512414), 2023-08-04
Supplement: s1 [file s1]

## Supplementary Information for

### Blocking nonspecific interactions using Y-shape poly(ethylene glycol)

#### Methods

##### Raman spectrum

In a typical measurement, SiO<sub>2</sub> substrates were characterized with a confocal Raman microscope (alpha300, WITec) with a 532 nm laser under atmospheric conditions. The microscope was equipped with a piezo scanner (P-500, Physik Instrumente) and a 100× objective (Nikon, NA 0.6). The laser powers were less than 2 mW during the measurements. The Raman scattered light was detected by a thermoelectrically cooled CCD detector (DU401A-BV, Andor) with an integration time of 10 s and 3 accumulations. The measurement and subsequent data analysis were performed with the software ScanCtrlSpectroscopyPlus (Version 1.38, WITec) and Project FOUR (Version 4.1 WITec). The SiO<sub>2</sub> substrates were cut into slides (1 × 1 cm<sup>2</sup>) and soaked in freshly prepared chromic acid overnight. After being washed with deionized (DI) water, ethanol, and acetone successively, the substrates were dried under a stream of nitrogen to produce surfaces with exposed hydroxyl groups. These substrates were immersed in an anhydrous toluene solution containing 5% (v/v) APTES (Merck, USA) at room temperature (R.T.) for 1 h. Then, they were washed with toluene and ethanol, dried under a nitrogen flow and incubated at 80 °C for 30 min. These substrates were immersed in DMSO containing 0.2 mM NHS-PEG-Mal, 0.2 mM NHS-linear PEG (mPEG) and 0.2 mM Y-shape PEG-SC (Y-mPEG) separately. Finally, these substrates were dried under a stream of nitrogen and stored dry.

##### Protein sequence

6×HIS-(GB1)<sub>4</sub>-Cys

MSGSHHHHHHGSMDTYKLILNGKTLKGETTTEAVDAATAEKVFKQYANDNGVDGEWT  
YDDATKTFTVTERSMDTYKLILNGKTLKGETTTEAVDAATAEKVFKQYANDNGVDGEW  
TYDDATKTFTVTERSMDTYKLILNGKTLKGETTTEAVDAATAEKVFKQYANDNGVDGE  
WTYDDATKTFTVTERSMDTYKLILNGKTLKGETTTEAVDAATAEKVFKQYANDNGVDG  
EWTYDDATKTFTVTERSC

## Supplementary Figures

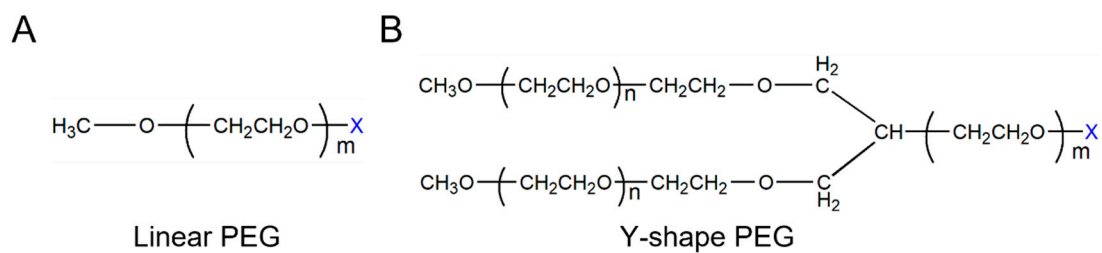

**Figure S1.** Chemical structures of linear PEG (A) and Y-shape PEG (B). X can be changed into various functional groups.

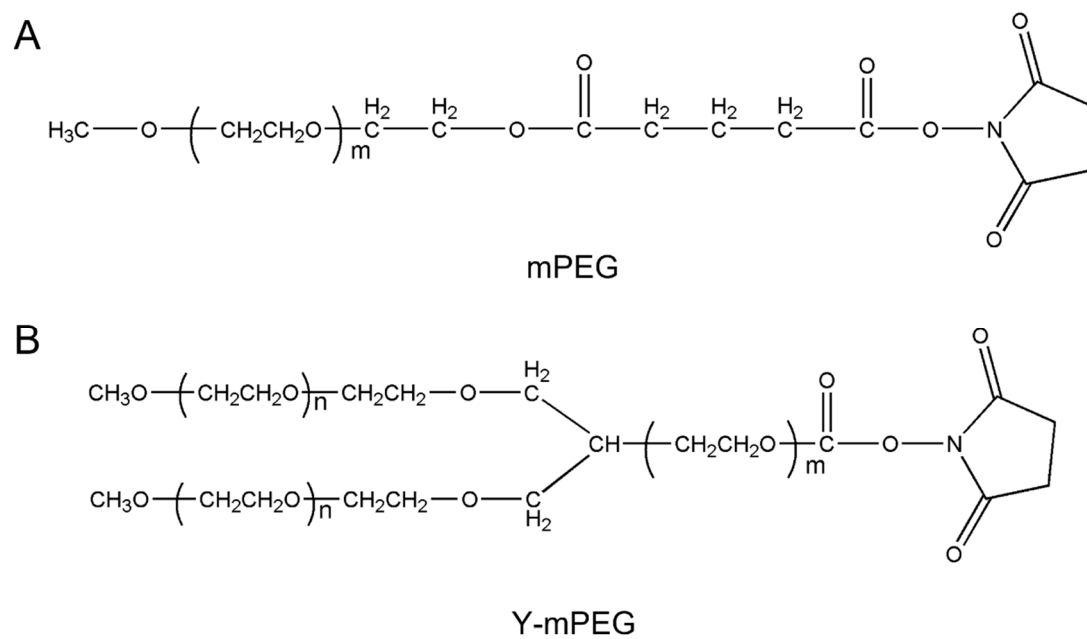

**Figure S2.** Chemical structures of mPEG (A) and Y-mPEG (B).

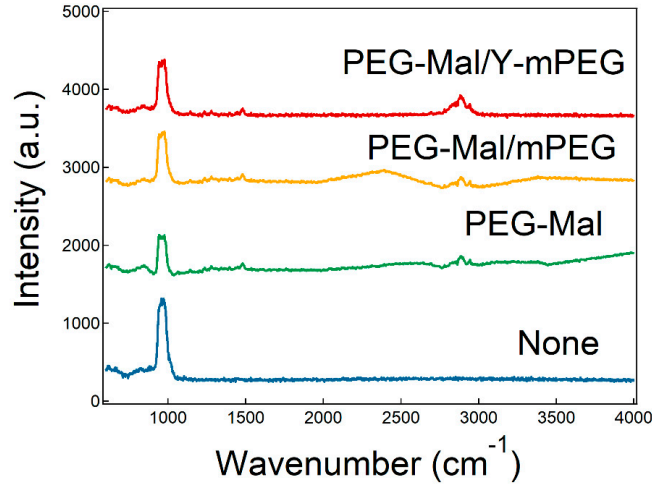

**Figure S3.** Raman spectrum of SiO<sub>2</sub> substrates modified with different PEGs. The small absorption peaks at 2883 cm<sup>-1</sup> can be attributed to the contribution of low-frequency C-H vibrations from PEG. In contrast, no significant absorption peak was observed in the substrate without modification.

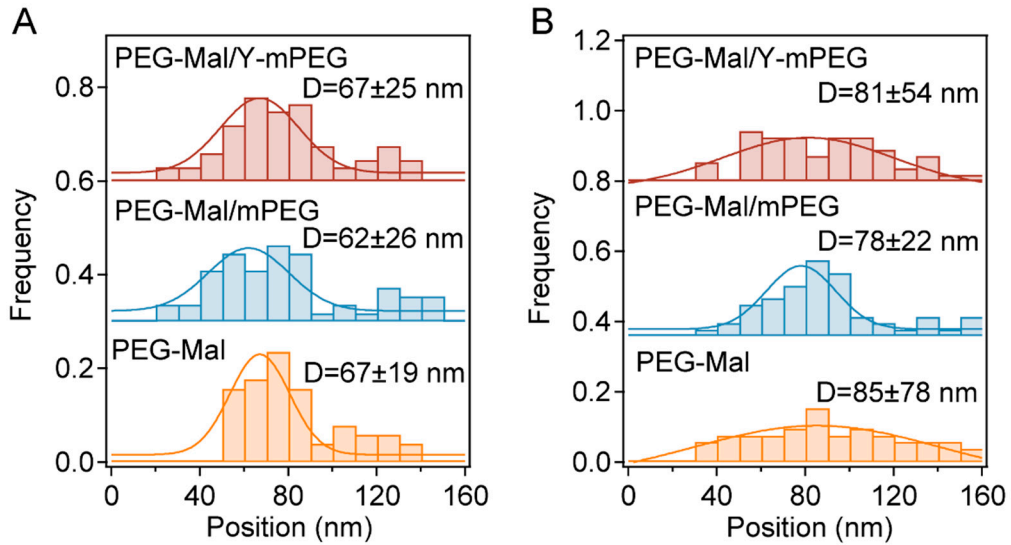

**Figure S4.** Position determination of the first GB1 unfolding peak. (A) Position of the first GB1 unfolding peak determined from the retract force-distance curves using different PEG-modified cantilevers. The Gaussian fitting shows average rupture positions of  $67 \pm 25$  nm,  $62 \pm 26$  nm and  $67 \pm 19$  nm, respectively. (B) Position of the first GB1 unfolding peak determined from the retract force-distance curves using different PEG-modified substrates. The Gaussian fitting shows average positions of  $81 \pm 54$  nm,  $78 \pm 22$  nm and  $85 \pm 78$  nm, respectively.

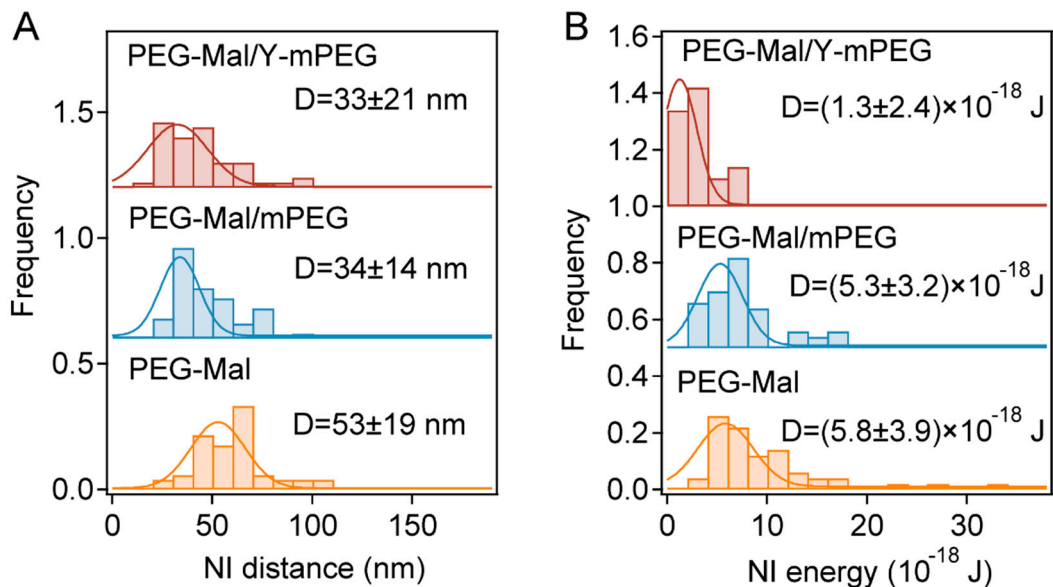

**Figure S5.** Histograms of fracture length (A) and energy (B) of the nonspecific interactions calculated from the retract force-distance curves in SMFS experiments using modified cantilevers ( $n=100$ ). The energy of the nonspecific interactions was obtained by calculating the area of nonspecific interaction peaks. The average fracture lengths were  $\sim 33$  nm,  $34$  nm and  $53$  nm in the PEG-Mal/Y-mPEG, PEG-Mal/mPEG and PEG-Mal groups, respectively. The average nonspecific interaction energies were  $\sim 1.3 \times 10^{-18}$  J,  $5.3 \times 10^{-18}$  J and  $5.8 \times 10^{-18}$  J in the PEG-Mal/Y-mPEG, PEG-Mal/mPEG and PEG-Mal groups, respectively.

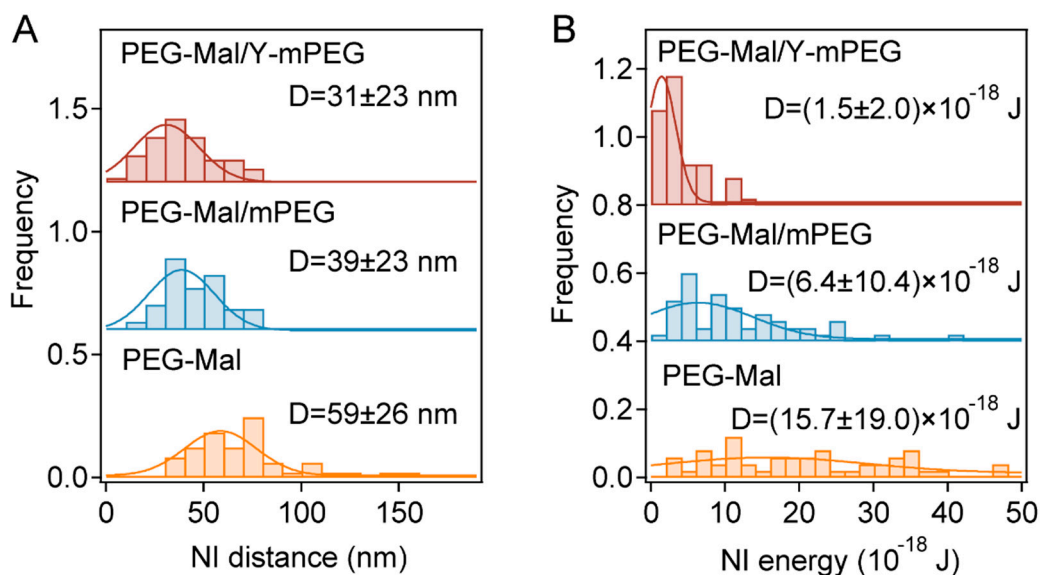

**Figure S6.** Histograms of fracture length (A) and energy (B) of the nonspecific interactions calculated from the retract force-distance curves in SMFS experiments using modified substrates ( $n=100$ ). The energy of the nonspecific interactions was

obtained by calculating the area of nonspecific interaction peaks. The average fracture lengths were  $\sim 31$  nm, 39 nm and 59 nm in the PEG-Mal/Y-mPEG, PEG-Mal/mPEG and PEG-Mal groups, respectively. The average nonspecific interaction energies were  $\sim 1.5 \times 10^{-18}$  J,  $6.4 \times 10^{-18}$  J and  $15.7 \times 10^{-18}$  J in the PEG-Mal/Y-mPEG, PEG-Mal/mPEG and PEG-Mal groups, respectively.

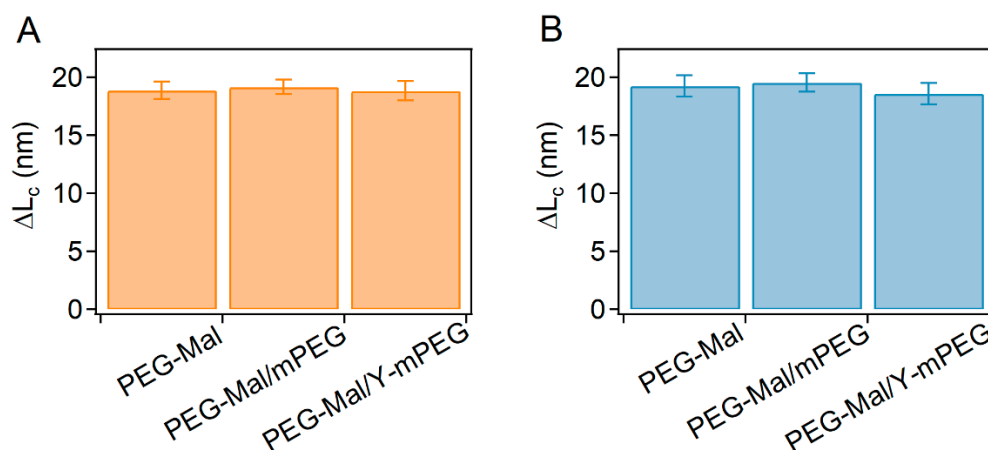

**Figure S7.**  $\Delta L_c$  of (GB1)<sub>4</sub>-Cys when SMFS was measured using modified cantilevers (A) or modified substrates (B).  $\Delta L_c$  corresponds to the distance between each protein unfolding peak.
